# Supplementary material for: Proteomic approach toward determining the molecular background of pazopanib resistance in synovial sarcoma
Source: PubMed Central journal article supplement (PMC5752544; doi:10.18632/oncotarget.22730), 2017-11-28
Supplement: oncotarget-08-109587-s001.pdf [file oncotarget-08-109587-s001.pdf]

# Proteomic approach toward determining the molecular background of pazopanib resistance in synovial sarcoma

## SUPPLEMENTARY MATERIALS

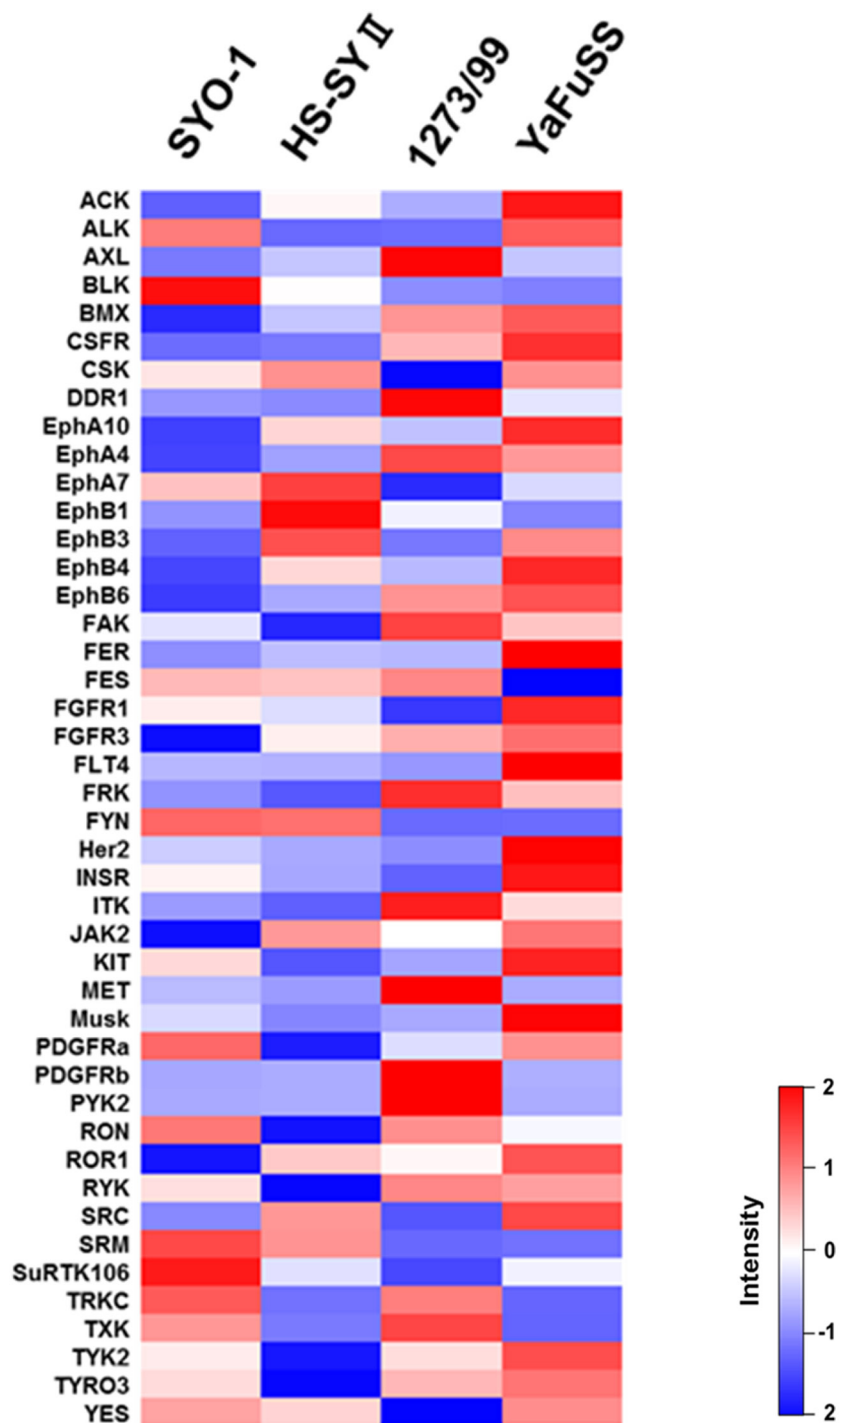

Supplementary Figure 1: Protein expression levels of 44 TKs identified by western blotting; the expression levels were normalized and are shown as a heatmap.

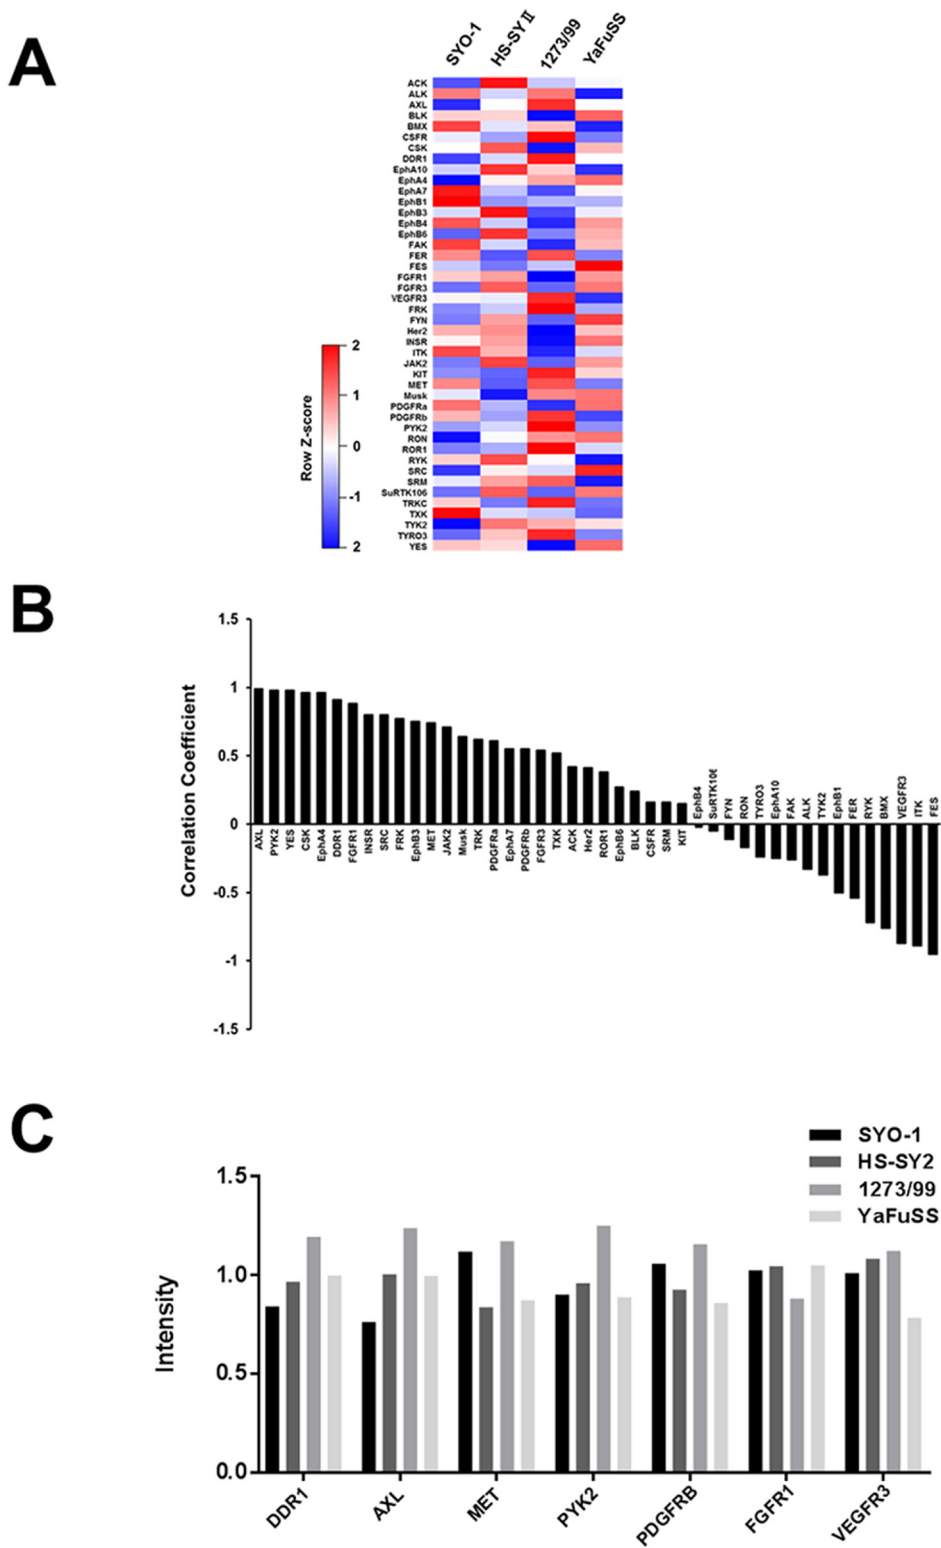

Supplementary Figure 2: Gene expression levels of 44 TKs identified by microarray; the expression levels were normalized and are shown as a heatmap. (A). Correlation coefficients between protein and mRNA expression levels are shown in (B), and the mRNA expression levels of highly expressed tyrosine kinases in 1273/99 cells are shown in (C).

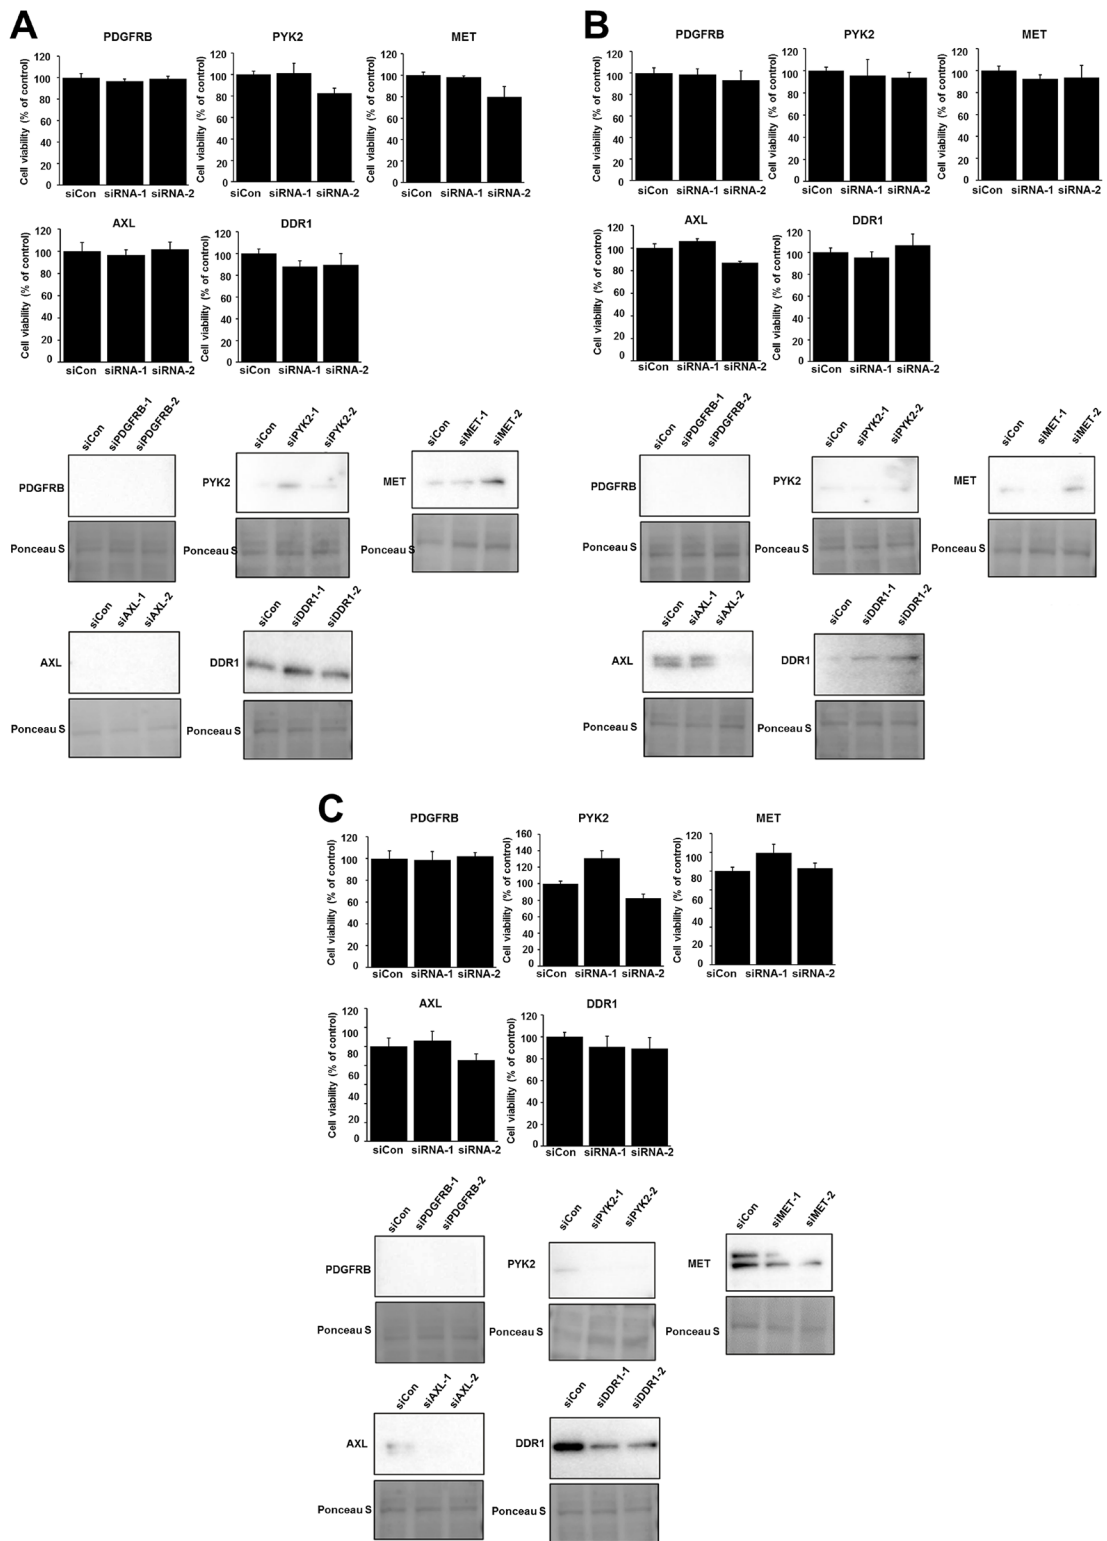

**Supplementary Figure 3:** Effect of siRNA-mediated gene silencing of upregulated TKs on cell proliferation in three synovial sarcoma cell lines: SYO-1 (A), HS-SYII (B), and YaFuSS (C).

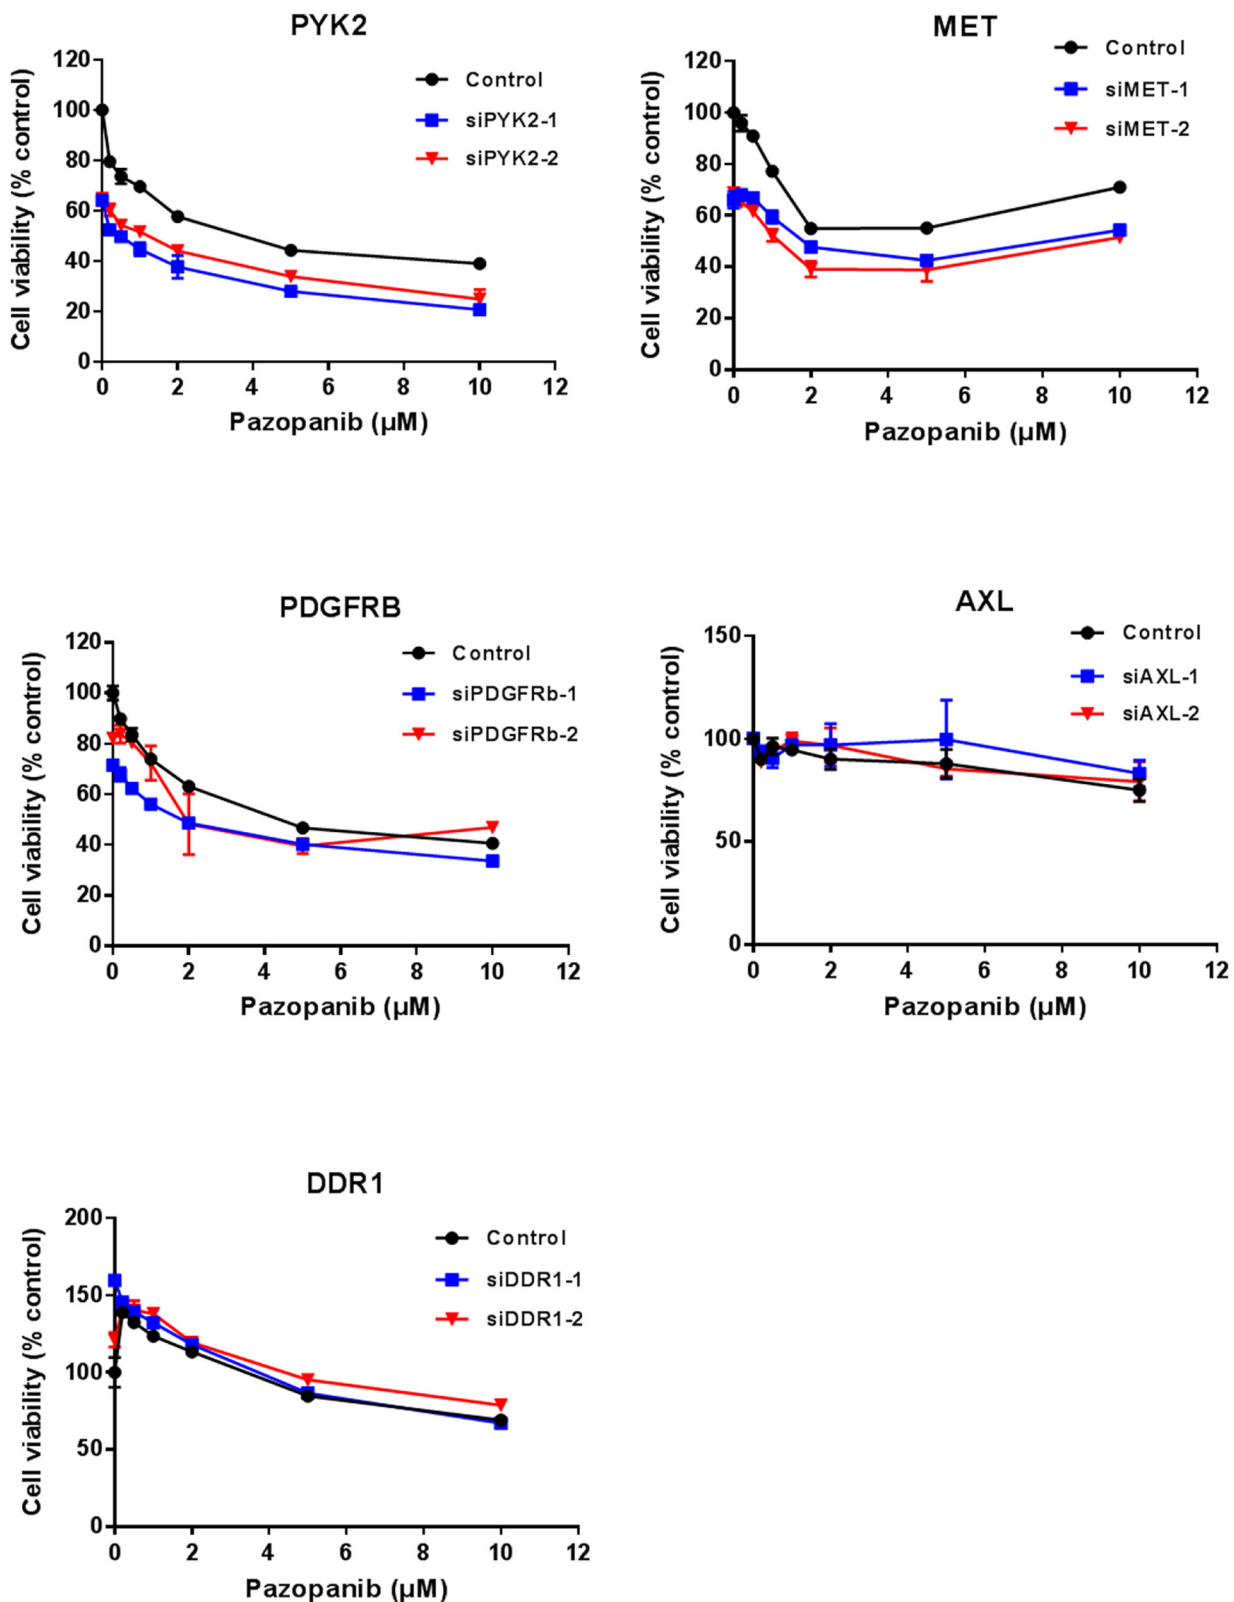

Supplementary Figure 4: Effect of a combination of siRNA-mediated gene silencing and pazopanib treatment on cell proliferation of 1273/99 cell line.

**Supplementary Table 1: List of antibodies used in western blotting.**

See Supplementary File 1

**Supplementary Table 2: List of siRNA sequences used in the study, used in experiments whose results are shown in Figure 3, Supplementary Figure 2, and Supplementary Figure 3.**

See Supplementary File 2

**Supplementary Table 3: Comparative analysis of pazopanib-sensitive and resistant cells using phosphotyrosine peptide substrate array.**

See Supplementary File 3
